# Supplementary material for: iTRAQ-based quantitative proteomic analysis of dark-germinated soybeans in response to salt stress
Source: Royal Society of Chemistry journal article supplement (doi:10.1039/c8ra02996b), 2018-01-01
Supplement: c8ra02996b1.pdf [file c8ra02996b1.pdf]

Supplementary Table 1 DAPs in germinated soybean under NaCl treatment.

| No <sup>a</sup>                | Fold change <sup>b</sup> | Description <sup>c</sup>                                                                    | Score <sup>d</sup> | Cov <sup>e</sup> | MW <sup>f</sup> | pI <sup>g</sup> |
|--------------------------------|--------------------------|---------------------------------------------------------------------------------------------|--------------------|------------------|-----------------|-----------------|
| <b>Defense/Stress</b>          |                          |                                                                                             |                    |                  |                 |                 |
| C6TBQ4                         | 0.35±0.05                | Peroxidase                                                                                  | 0.00               | 17.39            | 27.6            | 6.87            |
| I1NH59                         | 0.51±0.04                | Ran-binding protein 1 homolog b                                                             | 14.30              | 23.28            | 27.4            | 5.29            |
| B3TDK7                         | 0.64±0.12                | Lipoxygenase                                                                                | 49.37              | 14.90            | 94.9            | 5.96            |
| D4N5G2                         | 0.65±0.06                | Rubisco activase                                                                            | 3.87               | 19.74            | 15.2            | 5.60            |
| I1LKF8                         | 1.61±0.19                | Late embryogenesis abundant protein D-34-like                                               | 5.71               | 9.01             | 37.6            | 7.36            |
| C6T5C9                         | 1.69±0.14                | Stress responsive alpha-beta barrel domain-containing protein                               | 6.41               | 17.32            | 18.2            | 4.41            |
| I1JFL5                         | 1.69±0.15                | Subtilisin-like protease SBT3.3                                                             | 6.61               | 22.37            | 16.7            | 5.36            |
| I1JP97                         | 1.83±0.23                | S-(hydroxymethyl)glutathione dehydrogenase                                                  | 126.53             | 46.64            | 27.6            | 5.39            |
| Q7M1R5                         | 2.10±0.35                | Superoxide dismutase [Cu-Zn]                                                                | 101.03             | 26.55            | 23.7            | 6.58            |
| Q9XER5                         | 2.16±0.31                | Seed maturation protein PM22                                                                | 4.65               | 16.13            | 6.9             | 12.03           |
| P05046                         | 2.20±0.18                | Lectin (Agglutinin) (SBA)                                                                   | 6.74               | 6.63             | 103.3           | 6.76            |
| C6TDF5                         | 2.34±0.13                | Formate dehydrogenase, mitochondrial                                                        | 7.10               | 23.53            | 14.7            | 6.52            |
| C6SWE8                         | 2.37±0.68                | Superoxide dismutase [Cu-Zn]                                                                | 9.29               | 7.53             | 52.4            | 5.96            |
| Q9XF18                         | 2.37±0.22                | Peroxidase                                                                                  | 28.32              | 10.49            | 81.7            | 5.34            |
| I1N747                         | 2.65±1.25                | P24 oleosin isoform A                                                                       | 2.51               | 10.62            | 23.6            | 8.94            |
| I1L849                         | 2.65±0.84                | Late embryogenesis abundant protein D-34-like                                               | 116.28             | 45.67            | 41.9            | 7.36            |
| A1KR24                         | 3.03±1.01                | Dehydrin                                                                                    | 20.63              | 12.31            | 35.5            | 9.00            |
| K7LDT9                         | 3.21±0.16                | Low-temperature-induced 65 kDa protein                                                      | 9.59               | 28.51            | 25.4            | 6.61            |
| P26413                         | 3.33±0.75                | Heat shock 70 kDa protein                                                                   | 38.05              | 20.16            | 70.8            | 5.49            |
| P26987                         | 4.01±1.21                | Stress-induced protein SAM22                                                                | 23.43              | 39.49            | 16.6            | 4.82            |
| B2YDR0                         | 4.06±1.67                | Gly m Bd 28K allergen                                                                       | 4.36               | 13.00            | 24.7            | 4.86            |
| Q39805                         | 4.63±0.94                | Dehydrin-like protein                                                                       | 105.10             | 29.23            | 50.7            | 6.19            |
| C6TEP1                         | 4.65±1.35                | 40S ribosomal protein S30                                                                   | 7.00               | 13.98            | 39.6            | 6.60            |
| I1LHP6                         | 5.24±0.93                | Vicilin-like antimicrobial peptides 2-2                                                     | 13.24              | 36.84            | 15.2            | 6.24            |
| <b>Carbohydrate metabolism</b> |                          |                                                                                             |                    |                  |                 |                 |
| I1J4J6                         | 0.43±0.09                | Malic enzyme                                                                                | 13.76              | 15.91            | 65.0            | 6.15            |
| Q1W376                         | 0.45±0.10                | Phosphomannomutase                                                                          | 4.43               | 1.98             | 114.2           | 6.70            |
| I1LKM5                         | 0.46±0.01                | Apoptosis-inducing factor homolog A                                                         | 41.31              | 47.97            | 32.1            | 6.96            |
| I1M307                         | 0.52±0.05                | Epidermis-specific secreted glycoprotein EP1-like                                           | 10.57              | 14.29            | 37.8            | 6.55            |
| K7MZJ1                         | 0.54±0.10                | Sucrose synthase                                                                            | 5.49               | 5.81             | 26.5            | 5.88            |
| I1KWM7                         | 0.56±0.10                | 6-phosphogluconate dehydrogenase, decarboxylating                                           | 15.10              | 20.73            | 45.6            | 7.15            |
| I1KQ93                         | 0.63±0.01                | Phosphoglucomutase, cytoplasmic-like                                                        | 15.09              | 11.51            | 63.4            | 5.53            |
| I1L6Y9                         | 1.54±0.14                | Alpha-galactosidase 1-like                                                                  | 0.00               | 5.12             | 40.7            | 9.38            |
| I1J6Z7                         | 1.63±0.13                | Aldo-keto reductase family 4 member C9                                                      | 0.00               | 7.50             | 39.3            | 9.42            |
| I1N4B8                         | 1.70±0.46                | Aldose 1-epimerase                                                                          | 3.07               | 2.55             | 43.6            | 6.37            |
| I1KC66                         | 1.72±0.23                | Glyceraldehyde-3-phosphate dehydrogenase                                                    | 0.00               | 2.65             | 85.1            | 6.09            |
| I1KEA0                         | 2.01±0.33                | Probable aldo-keto reductase 2                                                              | 21.11              | 10.08            | 53.5            | 6.48            |
| C6TJM8                         | 2.56±0.52                | Alpha-galactosidase                                                                         | 0.00               | 5.67             | 28.0            | 6.24            |
| I1KZ09                         | 3.77±1.52                | Enoyl-[acyl-carrier-protein] reductase [NADH] 2, chloroplastic-like                         | 5.12               | 10.54            | 34.9            | 6.65            |
| P10743                         | 3.78±0.08                | aldo-keto reductase 1                                                                       | 8.54               | 4.66             | 48.9            | 8.70            |
| I1NFH5                         | 4.11±0.52                | Dihydrolipoyllysine-residue acetyltransferase component 4 of pyruvate dehydrogenase complex | 1.97               | 10.18            | 41.7            | 8.51            |
| I1JXQ5                         | 4.33±1.05                | Alpha-mannosidase                                                                           | 6.28               | 4.37             | 48.8            | 6.64            |
| <b>Nucleotide metabolism</b>   |                          |                                                                                             |                    |                  |                 |                 |
| I1L5R2                         | 0.36±0.01                | UMP-CMP kinase                                                                              | 2.00               | 4.04             | 22.4            | 5.87            |

|                              |            |                                                                              |        |       |      |      |
|------------------------------|------------|------------------------------------------------------------------------------|--------|-------|------|------|
| I1LBH6                       | 0.49±0.10  | Benzyl alcohol O-benzoyltransferase-like                                     | 10.78  | 11.55 | 50.5 | 5.00 |
| P04670                       | 0.50±0.20  | Uricase (Nod-35)                                                             | 0.00   | 15.68 | 18.0 | 8.12 |
| I1K081                       | 0.51±0.04  | Nucleoside diphosphate kinase                                                | 3.96   | 1.34  | 57.2 | 6.25 |
| C6TK65                       | 0.64±0.02  | 31 kDa ribonucleoprotein, chloroplastic                                      | 2.23   | 10.67 | 25.0 | 8.85 |
| Q8GV25                       | 1.60±0.06  | Nucleoside diphosphate kinase                                                | 26.74  | 19.69 | 29.1 | 4.75 |
| I1MDY5                       | 1.62±0.11  | Dihydropyrimidinase                                                          | 0.00   | 3.97  | 41.3 | 8.53 |
| C6SZE4                       | 1.65±0.01  | 4-hydroxy-4-methyl-2-oxoglutarate aldolase                                   | 7.07   | 18.77 | 35.1 | 8.29 |
| I1K893                       | 1.66±0.13  | RNA-binding protein 1-like                                                   | 7.73   | 33.13 | 17.7 | 6.79 |
| I1JWB7                       | 1.67±0.25  | Methyl-CpG-binding domain-containing protein 10-like                         | 23.11  | 30.20 | 16.3 | 7.50 |
| K7KHJ7                       | 1.72±0.25  | Glycine-rich RNA-binding protein GRP1A-like                                  | 3.00   | 6.97  | 32.1 | 4.88 |
| E9KNA4                       | 2.03±0.35  | 14-3-3 protein SGF14h [Glycine max]                                          | 11.17  | 19.67 | 32.8 | 4.70 |
| <b>Energy</b>                |            |                                                                              |        |       |      |      |
| K7KNL2                       | 0.30±0.08  | Carbonic anhydrase                                                           | 5.34   | 4.33  | 68.7 | 5.58 |
| P00865                       | 0.33±0.04  | Ribulose biphosphate carboxylase small chain 1                               | 13.02  | 13.43 | 38.9 | 8.16 |
| I1KTM3                       | 0.34±0.07  | ADP,ATP carrier protein 1, mitochondrial                                     | 3.09   | 8.84  | 15.6 | 4.82 |
| P27066                       | 0.40±0.03  | Ribulose biphosphate carboxylase large chain                                 | 35.05  | 20.04 | 63.9 | 7.37 |
| I1NFS4                       | 0.46±0.12  | ATP synthase subunit beta                                                    | 0.00   | 3.48  | 59.9 | 6.98 |
| I1JPX8                       | 0.47±0.03  | Fructose-biphosphate aldolase                                                | 65.17  | 33.09 | 59.8 | 6.15 |
| C6T1J0                       | 0.48±0.09  | Ferredoxin                                                                   | 152.23 | 33.47 | 52.6 | 6.43 |
| Q38IX1                       | 0.49±0.23  | Glyceraldehyde-3-phosphate dehydrogenase                                     | 33.07  | 28.21 | 38.3 | 7.53 |
| O81279                       | 0.50±0.08  | Malate dehydrogenase                                                         | 2.76   | 3.54  | 43.3 | 7.74 |
| I1KNH5                       | 0.50±0.07  | Pyrophosphate--fructose 6-phosphate 1-phosphotransferase subunit beta (PF6P) | 16.08  | 17.88 | 38.5 | 6.79 |
| D7EYG6                       | 0.52±0.01  | V-type proton ATPase catalytic subunit A                                     | 5.72   | 18.41 | 25.6 | 8.12 |
| Q2PMS8                       | 0.53±0.11  | ATP synthase subunit alpha                                                   | 2.43   | 4.56  | 49.8 | 9.16 |
| Q9LLR1                       | 0.57±0.08  | Acetyl-CoA carboxylase                                                       | 0.00   | 2.37  | 79.6 | 7.81 |
| I1JBV5                       | 0.60±0.04  | Pyruvate dehydrogenase E1 component subunit alpha                            | 5.02   | 8.76  | 42.0 | 9.61 |
| K7MH04                       | 0.60±0.11  | Ferredoxin--NADP reductase                                                   | 7.09   | 7.42  | 58.7 | 7.50 |
| P45458                       | 0.65±0.01  | Malate synthase                                                              | 2.83   | 8.67  | 70.3 | 6.30 |
| G0T440                       | 1.59±0.14  | Purple acid phosphatase                                                      | 27.47  | 24.72 | 20.1 | 8.66 |
| I1M6P9                       | 1.77±0.19  | dihydrolipoyllysine-residue succinyltransferase                              | 32.21  | 20.84 | 43.2 | 8.25 |
| I1MB71                       | 2.86±0.43  | Fructose-biphosphate aldolase                                                | 19.01  | 15.00 | 27.3 | 5.73 |
| K7MAP7                       | 4.21±0.36  | Pentatricopeptide repeat-containing protein At5g19020, mitochondrial         | 21.48  | 15.49 | 55.7 | 5.21 |
| F4JLP5                       | 67.13±5.98 | Dihydrolipoyl dehydrogenase 2, chloroplastic                                 | 3.01   | 8.96  | 21.9 | 5.55 |
| <b>Amino acid metabolism</b> |            |                                                                              |        |       |      |      |
| Q42792                       | 0.39±0.01  | Asparagine synthetase                                                        | 11.48  | 12.00 | 34.3 | 5.77 |
| K7MQ84                       | 0.41±0.01  | Asparagine synthetase 1                                                      | 8.07   | 1.11  | 70.5 | 4.72 |
| A8C8H5                       | 0.43±0.12  | Glutamate decarboxylase                                                      | 48.35  | 17.27 | 65.2 | 6.64 |
| I1K3S5                       | 0.44±0.15  | Adenosylhomocysteinase                                                       | 4.30   | 3.90  | 51.9 | 6.93 |
| I1KG03                       | 0.45±0.24  | Methylenetetrahydrofolate reductase                                          | 7.48   | 8.90  | 48.0 | 5.49 |
| I1LH18                       | 0.59±0.06  | Acetylornithine deacetylase-like                                             | 4.47   | 8.07  | 62.8 | 6.58 |
| I1NFX7                       | 1.55±0.07  | D-3-phosphoglycerate dehydrogenase                                           | 17.73  | 30.38 | 27.0 | 5.71 |
| I1NA39                       | 1.57±0.03  | Glutathione S-transferase L3                                                 | 9.04   | 9.97  | 32.3 | 5.87 |
| I1JW29                       | 1.73±0.24  | Probable protein arginine N-methyltransferase 3                              | 43.50  | 14.85 | 53.2 | 5.88 |
| I1J6Q1                       | 1.84±0.03  | Methionine aminopeptidase                                                    | 7.37   | 5.17  | 57.2 | 5.82 |
| C6TIP9                       | 1.93±0.13  | Cysteine synthase                                                            | 28.39  | 19.00 | 65.2 | 6.73 |
| Q8W1A0                       | 2.58±0.96  | Cysteine synthase                                                            | 19.50  | 19.38 | 34.2 | 5.82 |
| <b>Signal transduction</b>   |            |                                                                              |        |       |      |      |
| H1AD80                       | 0.65±0.05  | Truncate phytochrome A2 protein                                              | 5.46   | 4.08  | 84.0 | 6.71 |
| I1MCF0                       | 1.68±0.15  | SNF1-related protein kinase regulatory subunit                               | 7.83   | 10.17 | 45.2 | 6.43 |

gamma-like PV42a

| Cell growth/division            |            |                                                               |        |       |       |       |
|---------------------------------|------------|---------------------------------------------------------------|--------|-------|-------|-------|
| I1K2I1                          | 0.39±0.04  | Tubulin alpha chain                                           | 56.52  | 36.16 | 50.4  | 4.83  |
| C6TJ78                          | 0.51±0.24  | Actin-11                                                      | 15.89  | 21.22 | 41.8  | 5.40  |
| I1K7J4                          | 0.59±0.11  | Tubulin beta chain                                            | 34.99  | 20.76 | 90.8  | 5.24  |
| I1NGB7                          | 0.62±0.25  | RAN GTPase-activating protein 2-like                          | 2.21   | 0.40  | 261.5 | 5.03  |
| I1LDR2                          | 0.65±0.09  | Tubulin beta-1 chain                                          | 5.45   | 23.89 | 12.8  | 4.94  |
| I1JXA0                          | 1.64±0.09  | Cell division cycle protein 48 homolog                        | 3.20   | 2.07  | 57.9  | 4.72  |
| I1KYK0                          | 2.00±0.03  | Fasciclin-like arabinogalactan protein 1                      | 2.50   | 3.61  | 43.7  | 6.24  |
| I1L957                          | 2.56±0.65  | Embryonic protein DC-8-like                                   | 34.77  | 33.41 | 48.8  | 6.42  |
| C6T5I8                          | 2.75±0.04  | Tubulin-specific chaperone A                                  | 25.39  | 23.11 | 49.6  | 5.10  |
| P04347                          | 10.73±0.93 | Phragmoplast orienting kinesin 2 isoform X3                   | 4.29   | 13.33 | 11.5  | 5.60  |
| I1JLC8                          | 11.82±4.07 | Protein SLE2                                                  | 31.89  | 26.56 | 50.4  | 4.87  |
| Proteolysis                     |            |                                                               |        |       |       |       |
| I1NBK8                          | 0.53±0.10  | Cathepsin B                                                   | 10.02  | 32.65 | 27.7  | 7.27  |
| I1JWD2                          | 0.55±0.05  | Carboxypeptidase                                              | 0.00   | 4.00  | 33.4  | 7.01  |
| K7N0R1                          | 0.58±0.05  | Carboxypeptidase                                              | 9.88   | 11.16 | 46.9  | 8.54  |
| C6SXU0                          | 1.88±0.26  | Cysteine proteinase inhibitor                                 | 20.63  | 14.04 | 39.4  | 6.27  |
| I1JW44                          | 2.63±0.06  | Protein ASPARTIC PROTEASE IN GUARD CELL 2-like                | 2.49   | 2.28  | 54.8  | 6.14  |
| Protein destination and storage |            |                                                               |        |       |       |       |
| P10742                          | 0.64±0.08  | Stem 31 kDa glycoprotein                                      | 34.66  | 17.88 | 67.9  | 6.58  |
| C6K8D0                          | 0.65±0.04  | Trypsin inhibitor 26 kDa isoform                              | 134.77 | 59.84 | 29.3  | 7.21  |
| K7MIV6                          | 1.55±0.02  | Kunitz-type elastase inhibitor BrEI-like                      | 6.15   | 8.67  | 18.9  | 5.60  |
| Q9SPJ6                          | 2.02±0.27  | Maturation protein pPM32                                      | 296.44 | 62.39 | 53.6  | 6.07  |
| Q7XXT2                          | 2.03±0.10  | Prepro beta-conglycinin alpha prime subunit                   | 719.70 | 46.59 | 63.1  | 4.96  |
| Q9XET0                          | 2.08±0.29  | Seed maturation protein PM30                                  | 141.92 | 31.29 | 55.7  | 6.55  |
| Q8RVH5                          | 2.10±0.07  | Basic 7S globulin 2                                           | 310.93 | 46.60 | 54.4  | 5.58  |
| Q9XIS8                          | 2.42±0.36  | Trypsin inhibitor p20 precursor                               | 541.89 | 46.25 | 63.6  | 5.55  |
| C6K8D1                          | 2.48±0.63  | Seed biotinylated protein 68 kDa isoform                      | 21.05  | 20.59 | 25.9  | 8.32  |
| Q9XET1                          | 2.64±1.09  | Seed maturation protein PM31                                  | 217.55 | 46.12 | 57.9  | 5.90  |
| P25974                          | 2.76±1.12  | Beta-conglycinin                                              | 192.38 | 39.29 | 54.2  | 5.97  |
| P11828                          | 3.11±1.70  | Glycinin G3                                                   | 55.84  | 24.84 | 17.7  | 6.55  |
| O22120                          | 3.40±0.36  | Alpha subunit of beta conglycinin                             | 598.59 | 52.87 | 47.8  | 8.15  |
| I1LE33                          | 4.50±0.94  | Beta-conglycinin, beta chain-like                             | 9.43   | 26.17 | 23.6  | 7.33  |
| P04405                          | 5.93±1.26  | Glycinin G2 precursor                                         | 40.92  | 21.71 | 47.2  | 8.25  |
| P13917                          | 6.13±2.13  | Chain D, Crystal Structure Of Basic Globulin                  | 538.33 | 47.60 | 47.9  | 5.92  |
| P04776                          | 6.66±1.05  | Glycinin G1                                                   | 1.72   | 3.88  | 22.6  | 5.58  |
| Q84V19                          | 7.84±0.65  | Sucrose-binding protein 2                                     | 41.00  | 18.32 | 68.2  | 6.32  |
| P04347                          | 10.73±1.55 | Glycinin                                                      | 20.57  | 24.29 | 15.1  | 8.90  |
| Q9S9D0                          | 14.75±2.68 | Glycinin G4 subunit                                           | 37.65  | 20.35 | 43.7  | 8.48  |
| Transporters                    |            |                                                               |        |       |       |       |
| C6T9E5                          | 0.45±0.03  | ADP,ATP carrier protein 1, mitochondrial                      | 5.64   | 1.89  | 53.8  | 4.60  |
| Q13367                          | 0.54±0.05  | Coatomer subunit beta'-2                                      | 4.46   | 2.83  | 24.2  | 8.81  |
| Q9FQE4                          | 0.54±0.13  | Glutathione S-transferase GST 14                              | 22.11  | 12.22 | 25.1  | 6.42  |
| C6T9M6                          | 3.57±0.50  | Reticulon-like protein                                        | 0.00   | 5.48  | 25.3  | 7.59  |
| C6T1R3                          | 6.26±1.91  | GTP-binding nuclear protein                                   | 4.65   | 11.05 | 42.1  | 9.70  |
| Protein synthesis/folding       |            |                                                               |        |       |       |       |
| I1JGR4                          | 0.25±0.09  | Eukaryotic translation initiation factor isoform 4G-1-like    | 5.03   | 9.05  | 25.9  | 10.15 |
| I1KRD4                          | 0.39±0.05  | 26S proteasome non-ATPase regulatory subunit 8 homolog A-like | 6.00   | 14.55 | 11.1  | 4.32  |

|                                 |            |                                                                                    |         |       |       |       |
|---------------------------------|------------|------------------------------------------------------------------------------------|---------|-------|-------|-------|
| Q2PMQ0                          | 0.45±0.13  | 30S ribosomal protein S8                                                           | 3.40    | 5.22  | 111.7 | 9.33  |
| I1KQE3                          | 0.51±0.09  | 40S ribosomal protein S16-like                                                     | 41.35   | 27.27 | 30.0  | 10.23 |
| I1KZJ9                          | 0.55±0.10  | Glycine--tRNA ligase, mitochondrial 1                                              | 3.32    | 11.49 | 10.2  | 10.84 |
| K7KIC0                          | 0.55±0.17  | Eukaryotic translation initiation factor subunit B (eIF3b) (eIF-3-eta) (eIF3 p110) | 3 4.80  | 5.45  | 46.9  | 5.96  |
| I1LDE9                          | 0.57±0.18  | 60S ribosomal protein L3                                                           | 3.59    | 8.22  | 16.7  | 10.92 |
| K7MV98                          | 0.58±0.13  | Eukaryotic translation initiation factor subunit H (eIF3h)                         | 3 2.69  | 5.68  | 25.8  | 4.87  |
| I1M6M4                          | 0.60±0.13  | Trigger factor-like protein TIG, Chloroplastic                                     | 5.18    | 2.86  | 68.8  | 5.97  |
| I1K970                          | 0.61±0.10  | 26S proteasome non-ATPase regulatory subunit 11 homolog                            | 10.01   | 18.46 | 7.5   | 11.17 |
| K7M7B5                          | 0.61±0.03  | 60S ribosomal protein L10-like                                                     | 2.28    | 10.05 | 20.7  | 7.64  |
| I1MJL6                          | 1.57±0.09  | 60S ribosomal protein L6                                                           | 5.38    | 10.12 | 29.2  | 4.60  |
| I1L1H7                          | 1.62±0.12  | Translation machinery-associated protein 22                                        | 5.94    | 12.20 | 23.8  | 11.44 |
| I1L3W4                          | 1.67±0.05  | Eukaryotic translation initiation factor subunit J                                 | 3 5.71  | 7.05  | 34.0  | 9.29  |
| I1KA65                          | 1.68±0.03  | Ubiquitin-fold modifier 1                                                          | 19.48   | 15.12 | 50.6  | 6.67  |
| C6SYM3                          | 1.72±0.16  | 50S ribosomal protein L31                                                          | 2.09    | 11.94 | 15.7  | 10.30 |
| I1LL59                          | 1.76±0.24  | Protein disulfide isomerase                                                        | 8.50    | 2.81  | 86.1  | 8.00  |
| I1JSC6                          | 2.02±0.50  | 50S ribosomal protein L3, chloroplastic-like                                       | 3.68    | 13.53 | 14.9  | 9.54  |
| C6SZ18                          | 2.04±0.46  | 40S ribosomal protein S28                                                          | 14.18   | 6.45  | 17.4  | 10.20 |
| C6TN03                          | 2.04±0.04  | 40S ribosomal protein S4                                                           | 8.82    | 17.22 | 44.4  | 10.17 |
| I1JYI8                          | 2.11±0.04  | 60S acidic ribosomal protein P1                                                    | 4.99    | 13.31 | 28.8  | 10.45 |
| Q39871                          | 2.65±0.86  | Maturation polypeptide                                                             | 2.76    | 2.70  | 60.8  | 8.22  |
| K7MYU5                          | 3.13±1.09  | Eukaryotic translation initiation factor subunit A                                 | 3 2.54  | 20.27 | 7.9   | 8.76  |
| K7N3S3                          | 3.39±0.64  | 60S ribosomal protein L36                                                          | 2.78    | 4.95  | 64.8  | 4.79  |
| I1NB91                          | 3.43±0.03  | Ribosomal protein L19                                                              | 6.94    | 11.74 | 61.2  | 5.21  |
| I1JAL4                          | 3.75±0.74  | Probable acyl-activating enzyme peroxisomal                                        | 1, 0.00 | 15.84 | 11.7  | 9.52  |
| I1M3C1                          | 5.00±1.70  | 60S ribosomal protein L5                                                           | 6.73    | 6.07  | 81.0  | 7.39  |
| I1M290                          | 5.41±2.00  | 60S ribosomal protein L26-1-like                                                   | 7.08    | 13.48 | 30.9  | 5.08  |
| Q6VEV1                          | 13.80±1.34 | 40S ribosomal protein S25                                                          | 3.02    | 10.64 | 10.5  | 10.76 |
| <b>Secondary metabolism</b>     |            |                                                                                    |         |       |       |       |
| Q70EW1                          | 0.39±0.16  | Amine oxidase                                                                      | 6.63    | 14.89 | 20.9  | 9.04  |
| I1JE17                          | 0.47±0.12  | Glycosyltransferase                                                                | 6.55    | 8.86  | 51.4  | 6.09  |
| I1MTH5                          | 0.51±0.03  | 1-deoxy-D-xylulose 5-phosphate reductoisomerase, chloroplastic-like                | 17.52   | 27.17 | 41.7  | 5.78  |
| I1J637                          | 0.59±0.12  | Alpha-1,4-glucan-protein synthase                                                  | 1.73    | 2.32  | 53.1  | 5.86  |
| C6TBV6                          | 0.65±0.14  | Pathogenesis-related protein                                                       | 33.28   | 18.42 | 75.6  | 7.40  |
| <b>Uncharacterized proteins</b> |            |                                                                                    |         |       |       |       |
| I1KAJ5                          | 0.45±0.03  | Hypothetical protein GLYMA_06G122600                                               | 16.20   | 17.80 | 36.9  | 6.15  |
| C6SYI8                          | 0.44±0.27  | Uncharacterized protein                                                            | 5.16    | 16.08 | 28.8  | 6.79  |
| C6T3M1                          | 0.45±0.22  | Uncharacterized protein                                                            | 1.67    | 13.75 | 17.3  | 8.19  |
| C6TG30                          | 0.45±0.21  | Uncharacterized protein                                                            | 15.63   | 30.52 | 23.5  | 6.21  |
| I1JYG3                          | 0.46±0.06  | Hypothetical protein GLYMA_04G226900                                               | 6.05    | 9.39  | 34.7  | 6.37  |
| I1MGM0                          | 0.60±0.06  | Hypothetical protein GLYMA_15G148900                                               | 2.80    | 8.81  | 31.5  | 6.24  |
| K7M9Q4                          | 0.61±0.08  | Hypothetical protein GLYMA_15G052500                                               | 13.95   | 33.98 | 26.2  | 4.89  |
| I1JEI0                          | 0.61±0.14  | Hypothetical protein GLYMA_02G120900                                               | 4.04    | 9.57  | 20.1  | 7.72  |
| C6T7G4                          | 0.63±0.11  | Uncharacterized protein                                                            | 2.28    | 14.41 | 24.1  | 6.15  |
| I1LCM6                          | 0.64±0.04  | Hypothetical protein GLYMA_10G197700                                               | 6.41    | 16.49 | 29.9  | 6.61  |
| I1JWW7                          | 0.64±0.05  | Hypothetical protein GLYMA_04G171400                                               | 2.04    | 9.29  | 25.3  | 9.51  |
| C6SXS9                          | 0.65±0.07  | Uncharacterized protein                                                            | 12.10   | 6.80  | 34.6  | 6.19  |
| C6TKQ3                          | 0.65±0.16  | Uncharacterized protein                                                            | 41.71   | 27.89 | 31.6  | 6.84  |
| K7MVK8                          | 0.66±0.08  | Uncharacterized protein                                                            | 7.09    | 38.76 | 14.0  | 6.15  |
| I1NJA4                          | 1.57±0.12  | Hypothetical protein GLYMA_20G245300                                               | 11.48   | 24.19 | 33.9  | 5.88  |

|        |           |                                      |        |       |      |       |
|--------|-----------|--------------------------------------|--------|-------|------|-------|
| C6T4P6 | 1.58±0.07 | Uncharacterized protein              | 7.01   | 18.60 | 10.3 | 10.35 |
| C6SWP9 | 1.65±0.16 | Uncharacterized protein              | 14.13  | 14.71 | 18.6 | 5.02  |
| C6TF55 | 1.70±0.30 | Uncharacterized protein              | 27.27  | 55.47 | 26.0 | 5.02  |
| C6TE70 | 1.71±0.14 | Uncharacterized protein              | 18.45  | 24.79 | 12.7 | 9.44  |
| C6T3K3 | 1.93±0.12 | Uncharacterized protein              | 52.23  | 30.97 | 17.8 | 6.38  |
| I1KRG4 | 1.94±0.07 | Hypothetical protein GLYMA_08G084800 | 4.71   | 14.29 | 31.4 | 8.22  |
| C6TEA3 | 1.99±0.44 | Uncharacterized protein              | 9.22   | 19.90 | 23.7 | 10.27 |
| C6THQ1 | 1.99±0.24 | Uncharacterized protein              | 5.00   | 12.07 | 24.8 | 9.85  |
| C6TG59 | 2.11±0.72 | Uncharacterized protein              | 3.08   | 4.98  | 44.1 | 7.62  |
| C6T9C2 | 2.13±0.59 | Uncharacterized protein              | 19.22  | 22.69 | 28.6 | 6.35  |
| C6TKH0 | 2.16±0.53 | Uncharacterized protein              | 5.36   | 6.40  | 58.1 | 7.02  |
| C6TMV9 | 2.30±0.28 | Uncharacterized protein              | 8.78   | 16.77 | 19.0 | 4.73  |
| C6T0B5 | 2.45±0.51 | Uncharacterized protein              | 3.93   | 8.10  | 44.1 | 7.65  |
| C6SYA7 | 2.48±0.13 | Uncharacterized protein              | 7.73   | 8.84  | 49.7 | 5.68  |
| C6TB98 | 2.49±0.50 | Uncharacterized protein              | 230.35 | 30.95 | 58.0 | 6.49  |
| K7L353 | 2.76±1.05 | Hypothetical protein GLYMA_07G219500 | 5.86   | 18.29 | 18.4 | 6.34  |
| I1LFE1 | 2.84±0.22 | Hypothetical protein GLYMA_10G291500 | 7.61   | 17.11 | 17.6 | 6.74  |
| I1J7G5 | 2.94±0.07 | Uncharacterized protein              | 6.58   | 24.28 | 29.7 | 9.06  |
| I1NGG4 | 3.01±0.73 | Hypothetical protein GLYMA_20G147600 | 14.61  | 9.29  | 21.5 | 10.21 |
| I1L4K5 | 3.57±1.20 | Hypothetical protein GLYMA_09G192800 | 9.98   | 26.56 | 21.7 | 9.50  |
| I1LE41 | 1.57±0.94 | Hypothetical protein GLYMA_10G247500 | 78.54  | 24.05 | 18.5 | 5.24  |
| I1L860 | 5.01±1.32 | Hypothetical protein GLYMA_10G028300 | 10.23  | 17.19 | 15.0 | 10.17 |
| C6T1Q7 | 5.15±2.40 | Uncharacterized protein              | 4.86   | 20.92 | 41.5 | 5.97  |

a Accession number according to the UniProtKB database

b The abundance ratio of proteins in soybeans under NaCl treatment compared to water

c Description, Homologue protein name obtained using Arabidopsis database from the UniProtKB

d Mascot score

e Sequence coverage

f MW, Theoretical molecular weight

g pI, Theoretical isoelectric point

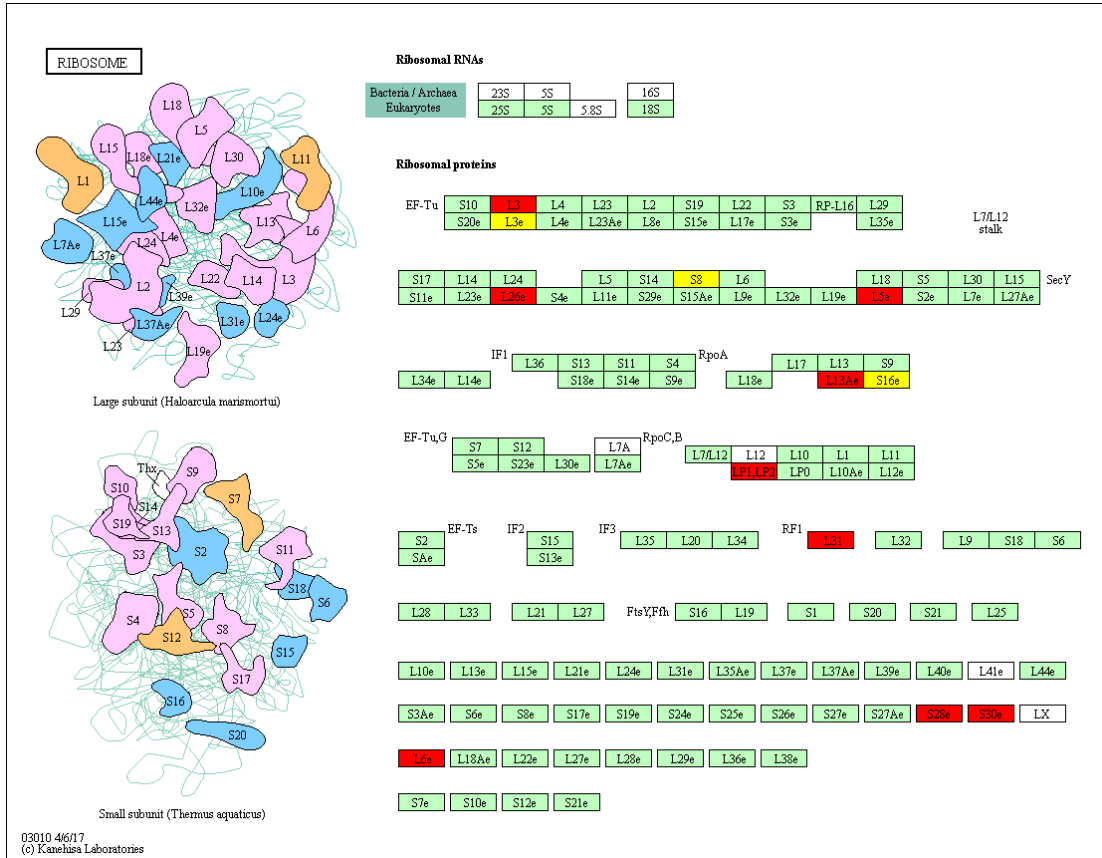

Supplementary Fig. S1 Schematic presentation of salinity stress-responsive proteins involved in ribosome pathway in soybeans. Red and yellow boxes indicate increased and decreased DAPs, respectively.
